# Supplementary material for: Comparative Genomics Analysis of Two Different Virulent Bovine Pasteurella multocida Isolates
Source: Hindawi journal article supplement (doi:10.1155/2016/4512493), 2016-01-01
Supplement: f1 [file 4512493.f1.pdf]

408

Table S1 The web links of some database in this study

| Databases                 | Web links                                                                                               |
|---------------------------|---------------------------------------------------------------------------------------------------------|
| Nr database               | <a href="ftp://ftp.ncbi.nih.gov/blast/db/">ftp://ftp.ncbi.nih.gov/blast/db/</a>                         |
| Swiss-Prot database       | <a href="ftp://ftp.uniprot.org/pub/databases/uniprot/">ftp://ftp.uniprot.org/pub/databases/uniprot/</a> |
| COG database              | <a href="http://www.ncbi.nlm.nih.gov/COG/">http://www.ncbi.nlm.nih.gov/COG/</a>                         |
| IS database               | <a href="https://www-is.biotoul.fr">https://www-is.biotoul.fr</a>                                       |
| virulence factor database | <a href="http://www.mgc.ac.cn/VFs">http://www.mgc.ac.cn/VFs</a>                                         |

409
